# Supplementary material for: Sequential Delivery of Different MicroRNA Nanocarriers Facilitates the M1-to-M2 Transition of Macrophages
Source: PubMed Central journal article supplement — ACS Omega. 2022 Feb 23;7(9):8174–83. doi: 10.1021/acsomega.2c00297 (PMC8908531; doi:10.1021/acsomega.2c00297), 2022-02-23
Supplement: ao2c00297_si_001.pdf [file ao2c00297_si_001.pdf]

# Sequential delivery of different microRNAs nanocarriers facilitates the M1-to-M2 transition of macrophages

Xueping Li<sup>a</sup>, Suling Xue<sup>a</sup>, Qi Zhan<sup>a</sup>, Xiaolei Sun<sup>a</sup>, Ning Chen<sup>a</sup>, Sidi Li<sup>b</sup>, Jin Zhao<sup>a\*</sup>,  
Xin Hou<sup>a</sup>, Xubo Yuan<sup>a</sup>

<sup>a</sup>Tianjin Key Laboratory of Composite and Functional Materials, School of Materials Science and Engineering, Tianjin University, Tianjin 300072, China

<sup>b</sup>College of Chemistry and Chemical Engineering, Yantai University, Yantai 264005, Shandong Province, China

\*Corresponding author. [zhaojin@tju.edu.cn](mailto:zhaojin@tju.edu.cn)

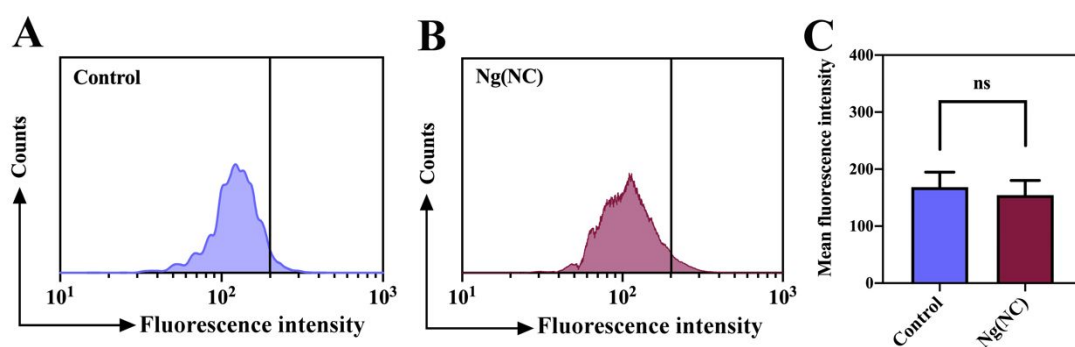

**Figure S1.** Flow cytometric analyses of macrophages phenotypes treated with PBS (A) or Ng(NC) (B). C) Quantitative analyses of fluorescence of A and B. ns indicates that the groups are not significantly different from each other.

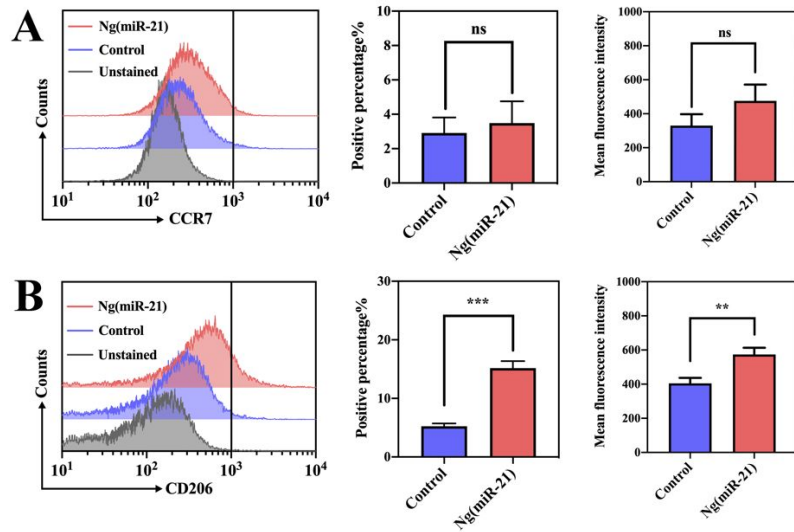

**Figure S2.** Flow cytometric analyses of macrophages phenotypes treated with Ng(miR-21). A) The M1 macrophages related marker CCR7. B) The M2 macrophages related marker CD206. \*\* $p < 0.01$ ; \*\*\* $p < 0.001$ ; ns indicates that the groups are not significantly different from each other.

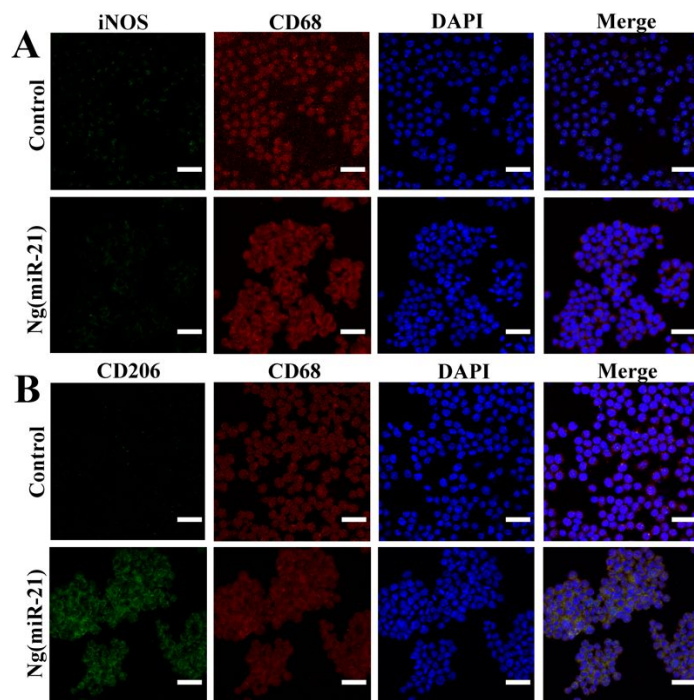

**Figure S3.** Immunofluorescence images of macrophages with the treatment of Ng(miR-21). A) The expression of iNOS (M1 phenotypes related marker). B) The expression of CD206 (M2 phenotypes related marker). The nuclei were counterstained with DAPI. The scale bars were 50  $\mu\text{m}$ .

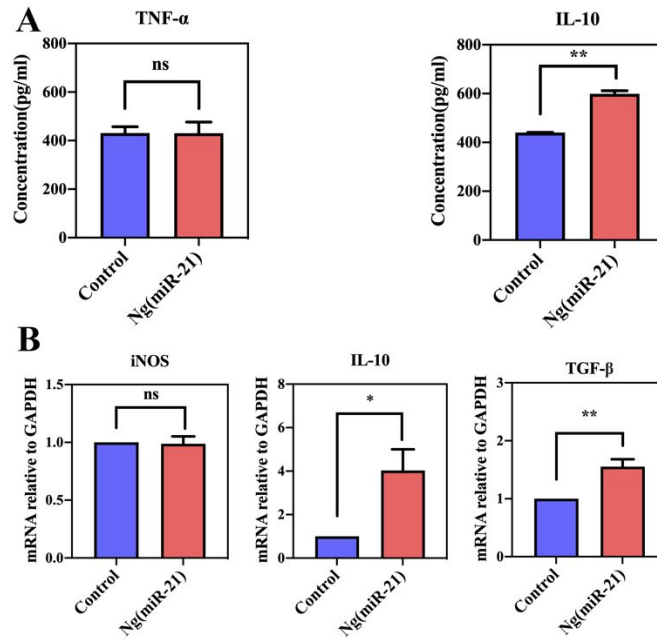

**Figure S4.** A) ELISA assay for TNF- $\alpha$  and iL-10 in the supernatant of RAW264.7 cells treated with Ng(miR-21). B) Real-time PCR analysis of relative genes expression of the M1-related iNOS and M2-related IL-10 and TGF- $\beta$ . \*p<0.05; \*\*p<0.01; ns indicates that the groups are not significantly different from each other.
